# Supplementary material
Source: PubMed Central journal article supplement (PMC9417274)
Supplement: NIHMS1830463-supplement-Supplemental.pdf [file NIHMS1830463-supplement-Supplemental.pdf]

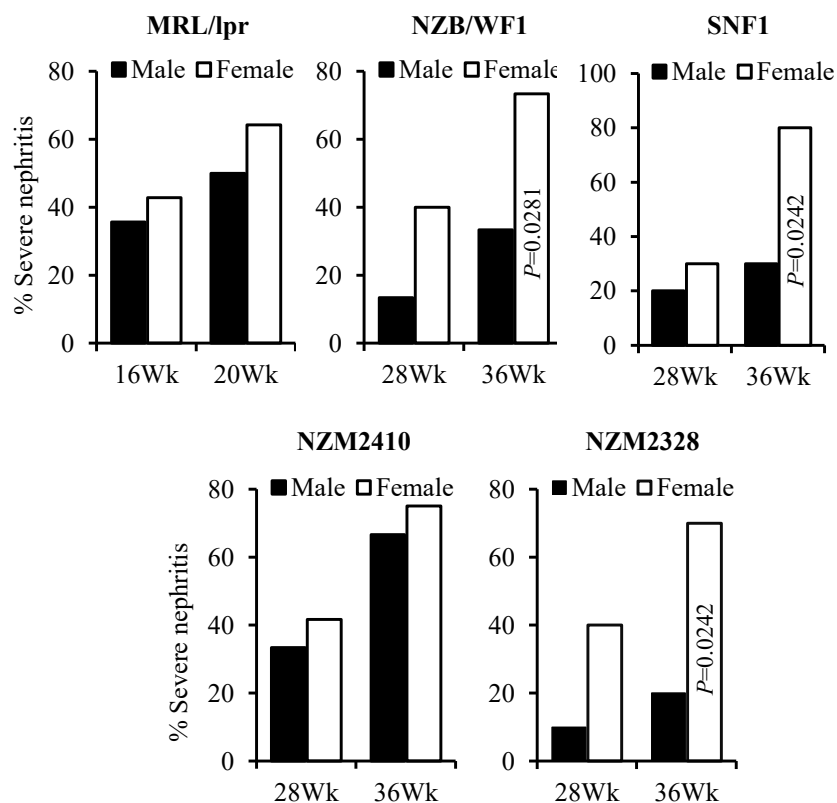

**Supplemental figure 1: Differences in severe nephritis incidence in lupus-prone male and female mice.** Urine samples were collected from all mice used for this study at timely intervals and tested for protein levels as described under the materials and methods section. Mice that showed proteinuria (>5 mg/ml) were considered to have severe nephritis.  $n=14$  males and 14 females for MRL/lpr, 15 males and 15 females for NZB/WF1, 10 males and 10 females for SNF1, 12 males and 12 females for NZM2410, and 10 males and 10 females for NZM2328 strains.  $P$ -value (by Mann-Whitney test) of specific age male vs female comparisons are shown.

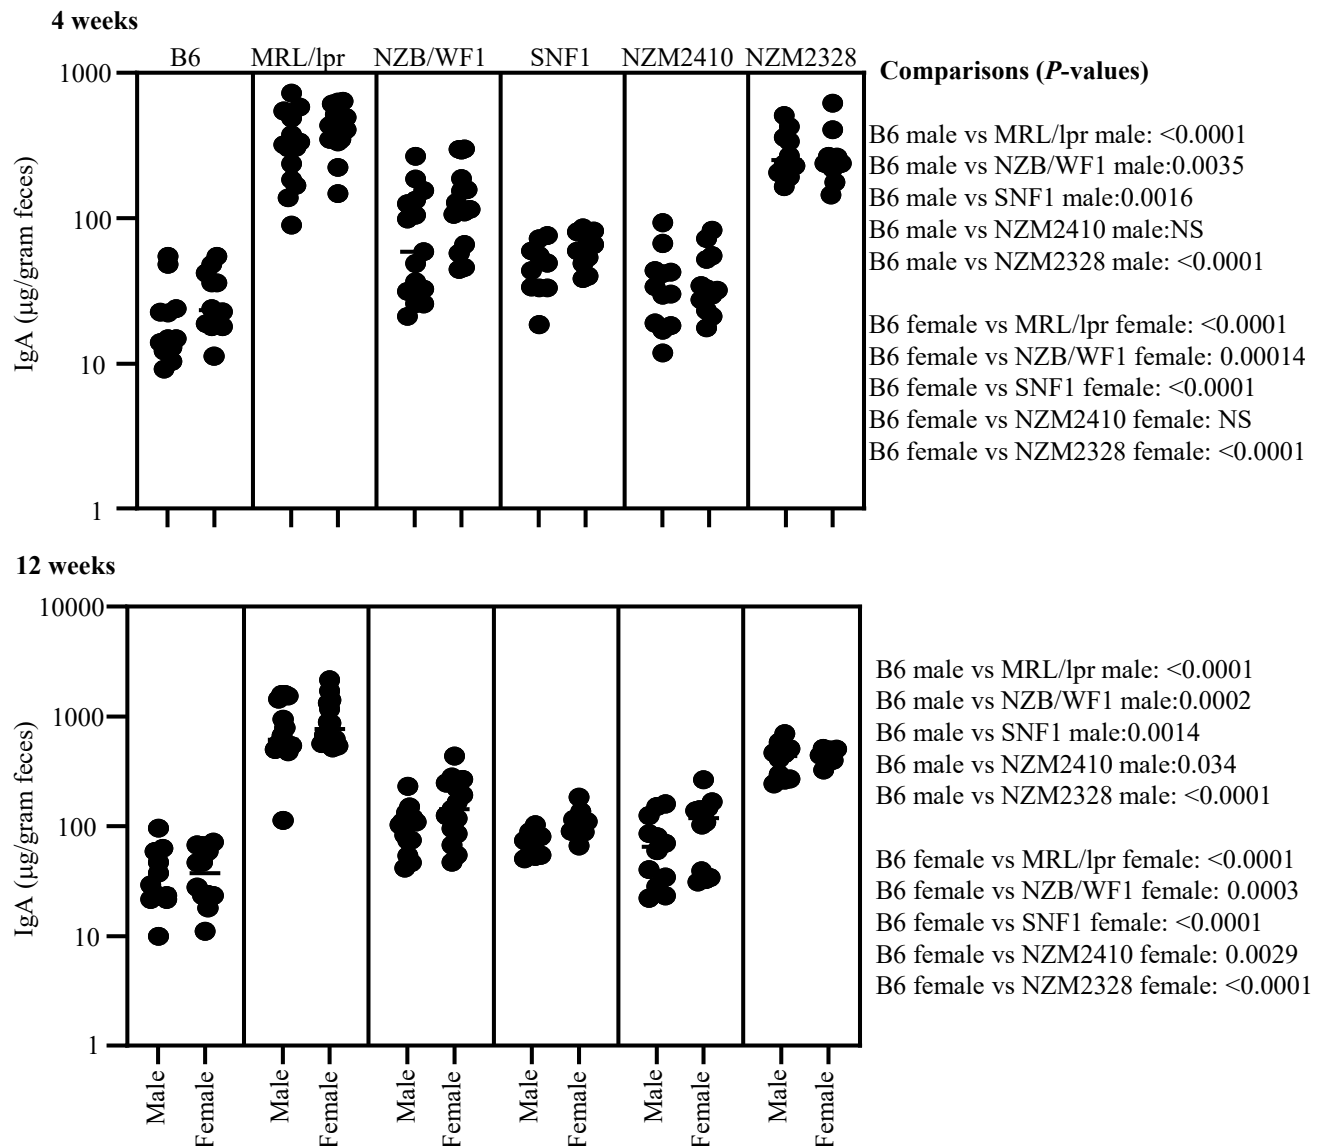

**Supplemental figure 2: Abundance of IgA in the feces of lupus-susceptible and non-susceptible mouse strains.** Fecal samples were collected from individual mice of indicated strains and subjected to ELISA to determine IgA concentrations as detailed under materials and methods section. IgA concentrations per gram feces (collected at 4 and 12 weeks of age) are shown.  $n=12$  males and 12 females for B6 mice, 4 males and 14 females for MRL/lpr, 15 males and 15 females for NZB/WF1, 10 males and 10 females for SNF1, 12 males and 12 females for NZM2410, and 10 males and 10 females for NZM2328 strains. *P*-value (by Mann-Whitney test) of various comparisons are shown on the right.

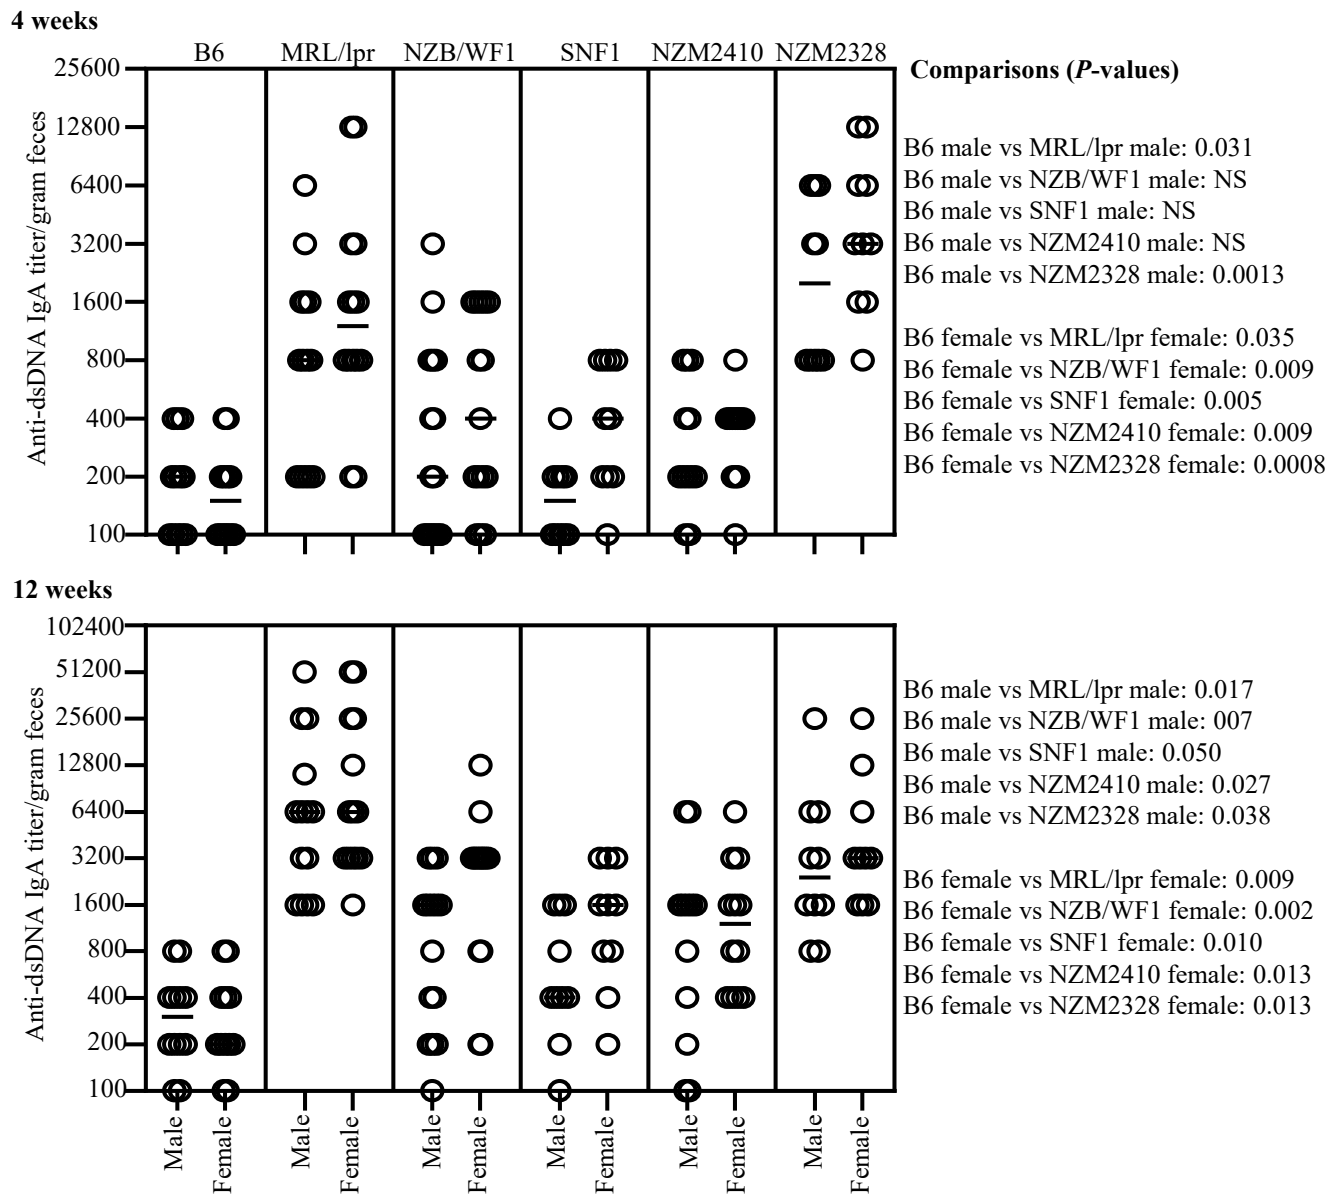

**Supplemental figure 3: dsDNA reactivity of IgA in the feces of lupus-susceptible and non-susceptible mouse strains.** Fecal samples were collected from individual mice of indicated strains and subjected to ELISA to determine dsDNA reactive IgA titers as detailed under the materials and methods section. dsDNA-reactive IgA per gram feces (collected at 4 and 12 weeks of age) are shown.  $n = 12$  males and 12 females for B6, 14 males and 14 females for MRL/lpr, 15 males and 15 females for NZB/WF1, 10 males and 10 females for SNF1, 12 males and 12 females for NZM2410, and 10 males and 10 females for NZM2328 strains. *P*-value (by Mann-Whitney test) of various comparisons are shown on the right. Similar differences were obtained when nucleohistone reactive IgA titers were compared (not shown).
